# Supplementary material for: Enhancing Mendelian Randomization Causal Inference through Pleiotropic Clustering in the Presence of Correlated Horizontal Pleiotropy
Source: Research Square preprint supplement (doi:10.21203/rs.3.rs-4116880/v1), 2024-05-09
Supplement: Supplementary file 1 [file cac871f1891192a779fe8a13.pdf]

# Enhancing Mendelian Randomization Causal Inference through Pleiotropic Clustering in the Presence of Correlated Horizontal Pleiotropy

## Supplementary Tables

**Supplementary Table 1:** False positive rate or Power to detect correlated horizontal pleiotropy in MR for different methods

| Correlated horizontal pleiotropy | Uncorrelated horizontal pleiotropy | P-threshold | Methods   | Causal effect/Correlated horizontal pleiotropic effect ( $\gamma/\eta$ ) |               |               |               |               |               |               |
|----------------------------------|------------------------------------|-------------|-----------|--------------------------------------------------------------------------|---------------|---------------|---------------|---------------|---------------|---------------|
|                                  |                                    |             |           | $\sqrt{0.00}$                                                            | $\sqrt{0.01}$ | $\sqrt{0.02}$ | $\sqrt{0.03}$ | $\sqrt{0.04}$ | $\sqrt{0.05}$ | mean(%)       |
| The Null (Absence)               | Absence                            | 0.05        | MR-PRESSO | 5                                                                        | 5             | 4             | 5             | 5             | 2             | 4.33          |
|                                  |                                    | 0.05        | PCMR      | 5                                                                        | 1             | 7             | 7             | 4             | 5             | 4.83          |
|                                  |                                    | 0.10        | MR-PRESSO | 14                                                                       | 13            | 8             | 13            | 10            | 8             | 11.00         |
|                                  |                                    | 0.10        | PCMR      | 11                                                                       | 7             | 10            | 12            | 13            | 10            | 10.50         |
|                                  | Presence                           | 0.05        | MR-PRESSO | 51                                                                       | 49            | 46            | 49            | 41            | 52            | 48.00         |
|                                  |                                    | 0.05        | PCMR      | 6                                                                        | 7             | 4             | 8             | 7             | 2             | 5.67          |
|                                  |                                    | 0.10        | MR-PRESSO | 54                                                                       | 58            | 54            | 57            | 53            | 61            | 56.17         |
|                                  |                                    | 0.10        | PCMR      | 9                                                                        | 11            | 8             | 12            | 13            | 5             | 9.67          |
| The Alternative (Presence)       | Absence                            | 0.05        | MR-PRESSO | -                                                                        | 17            | 40            | 58            | 76            | 77            | $\Delta 6.00$ |
|                                  |                                    | 0.05        | PCMR      | -                                                                        | 10            | 30            | 57            | 67            | 74            |               |
|                                  |                                    | 0.10        | MR-PRESSO | -                                                                        | 26            | 52            | 74            | 85            | 90            | $\Delta 6.20$ |
|                                  |                                    | 0.10        | PCMR      | -                                                                        | 24            | 41            | 67            | 82            | 82            |               |
|                                  | Presence                           | 0.05        | MR-PRESSO | -                                                                        | 68            | 75            | 81            | 94            | 93            | -             |
|                                  |                                    | 0.05        | PCMR      | -                                                                        | 13            | 26            | 33            | 51            | 63            | -             |
|                                  |                                    | 0.10        | MR-PRESSO | -                                                                        | 77            | 84            | 87            | 97            | 97            | -             |
|                                  |                                    | 0.10        | PCMR      | -                                                                        | 23            | 35            | 47            | 62            | 72            | -             |

Power (%). There are 100 simulations in each scenario. In the absence of correlated horizontal pleiotropy (The Null), the scenarios are simulated in causal effects,  $\gamma$ , from  $\sqrt{0.00}$  to  $\sqrt{0.05}$ . In the presence of correlated horizontal pleiotropy (The Alternative), the scenarios set the causal effect at zero and simulated in 40% correlated horizontal pleiotropic variants with effect  $\eta$  from  $\sqrt{0.01}$  to  $\sqrt{0.05}$ . The heritability of exposure is solely through exposure or confounding in the absence of uncorrelated horizontal pleiotropy, or set at 0.25 in the presence of correlated horizontal pleiotropy. The  $\Delta$ -mean indicates the mean power difference between MR-PRESSO and PCMR's pleiotropy test.

13 **Supplementary Table 2:** The GWAS summary statistics for Common diseases and psychiatric disorders.  
14

| Trait                                   | Abbreviation | Sample Size | PMID     | First Author(Year)     |
|-----------------------------------------|--------------|-------------|----------|------------------------|
| Triglycerides <sup>1</sup>              | tg           | 188577      | 24097068 | Willer (2013)          |
| ldl <sup>1</sup>                        | ldl          | 188577      | 24097068 | Willer (2013)          |
| hdl <sup>1</sup>                        | hdl          | 188577      | 24097068 | Willer (2013)          |
| height <sup>2</sup>                     | height       | 456426      | 30124842 | Yengo L(2018)          |
| body mass index <sup>3</sup>            | bmi          | 238944      | 25673413 | Locke AE (2015)        |
| body fat percentage <sup>4</sup>        | bf           | 100716      | 26833246 | Lu Y (2016)            |
| birth weight <sup>5</sup>               | bw           | 133903      | 27680694 | Horikoshi M (2016)     |
| diastolic blood pressure <sup>6</sup>   | dbp          | 757601      | 30224653 | Evangelou E (2018)     |
| systolic blood pressure <sup>6</sup>    | sbp          | 757601      | 30224653 | Evangelou E (2018)     |
| fasting blood glucose <sup>7</sup>      | fg           | 46186       | 20081858 | Dupuis J (2010)        |
| ever regular smoker <sup>8</sup>        | smoking      | 1232091     | 30643251 | Liu M (2019)           |
| drinks per week <sup>8</sup>            | alcohol      | 941280      | 30643251 | Liu M (2019)           |
| coronary artery disease <sup>9</sup>    | cad          | 547261      | 29212778 | van der Harst P (2017) |
| any stroke <sup>10</sup>                | stroke       | 446696      | 29531354 | Malik R (2018)         |
| type 2 diabetes <sup>11</sup>           | t2d          | 69033       | 22885922 | Morris AP (2012)       |
| asthma <sup>12</sup>                    | asthma       | 127669      | 29273806 | Demenais F (2017)      |
| Schizophrenia <sup>13</sup>             | scz          | 144605      | 35396580 | Trubetskoy V(2022)     |
| Major depressive disorder <sup>14</sup> | mdd          | 170756      | 30718901 | Howard(2019)           |
| Type 1 bipolar disorder <sup>15</sup>   | bip1         | 475038      | 34002096 | Mullins(2021)          |

15  
16  
17

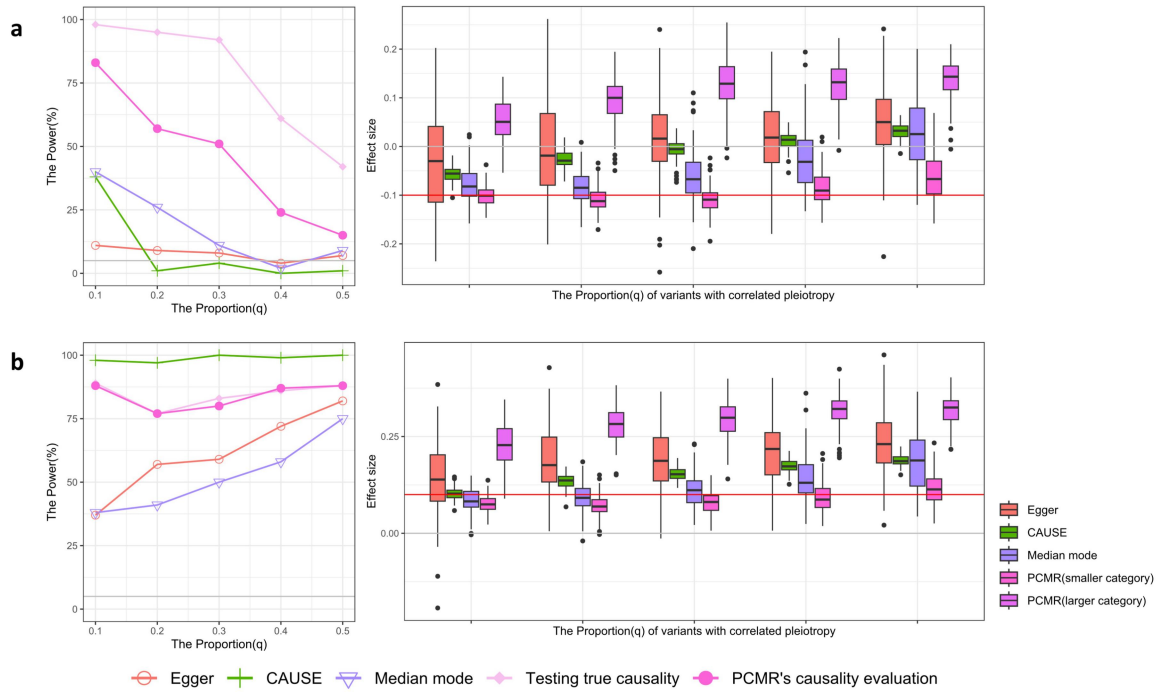

19

20 **Supplementary Fig. 1| The power and estimates of PCMR and three alternative MR methods in alternative**  
21 **hypothesis with correlated horizontal pleiotropy. a,** Comparison when causal effect ( $\gamma = -0.1$ ) and correlated  
22 horizontal pleiotropic effect in opposite. The proportion of correlated horizontal pleiotropic variants is from 10% to 50%,  
23 and the heritability of outcomes mediated by causal effects and confounding is 5%. **b,** Comparison when causal effect  
24 ( $\gamma = 0.1$ ) and correlated horizontal pleiotropic effect in the same direction. Testing true causality indicates that when the  
25 IV category determining true causal effect is identified, causal inference for this IV category relies on bootstrapping.  
26 There are 100 simulations in each scenario using a p-value threshold of 0.05.

27

28

29

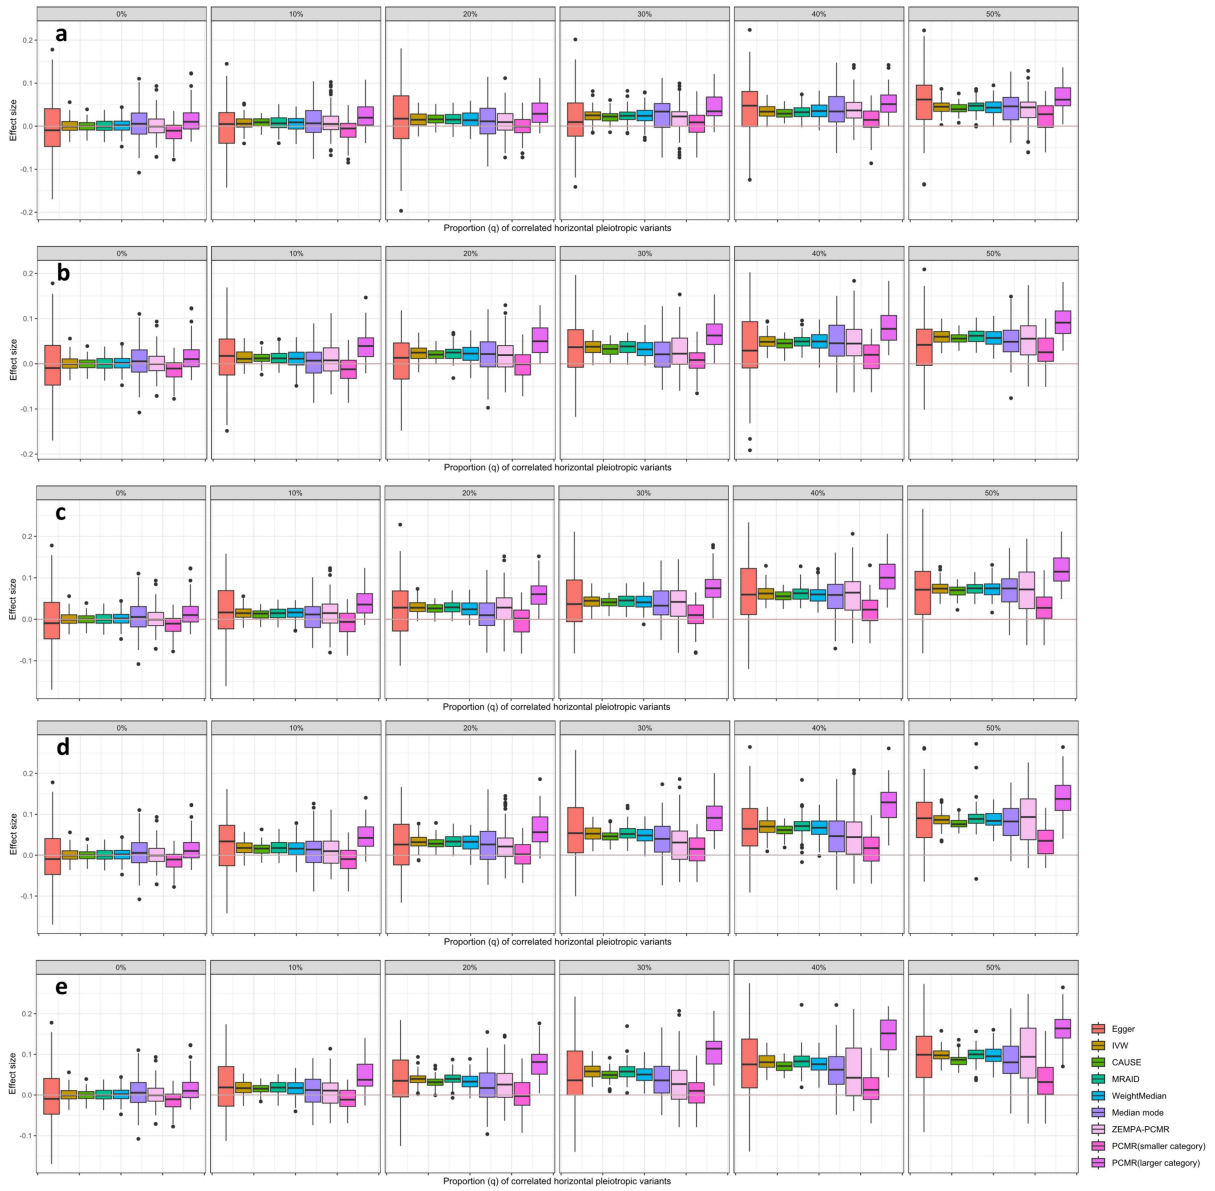

**Supplementary Fig. 2| The random effect model of PCMR and alternative methods in the null hypothesis.** The actual causal effect is zero in the presence of correlated pleiotropic variants ranging from 0% to 50% and correlated horizontal pleiotropic effects from  $\sqrt{0.01}$  to  $\sqrt{0.05}$ . **a**,  $\eta = \sqrt{0.01}$  **b**,  $\eta = \sqrt{0.02}$  **c**,  $\eta = \sqrt{0.03}$  **d**,  $\eta = \sqrt{0.04}$  **e**,  $\eta = \sqrt{0.05}$

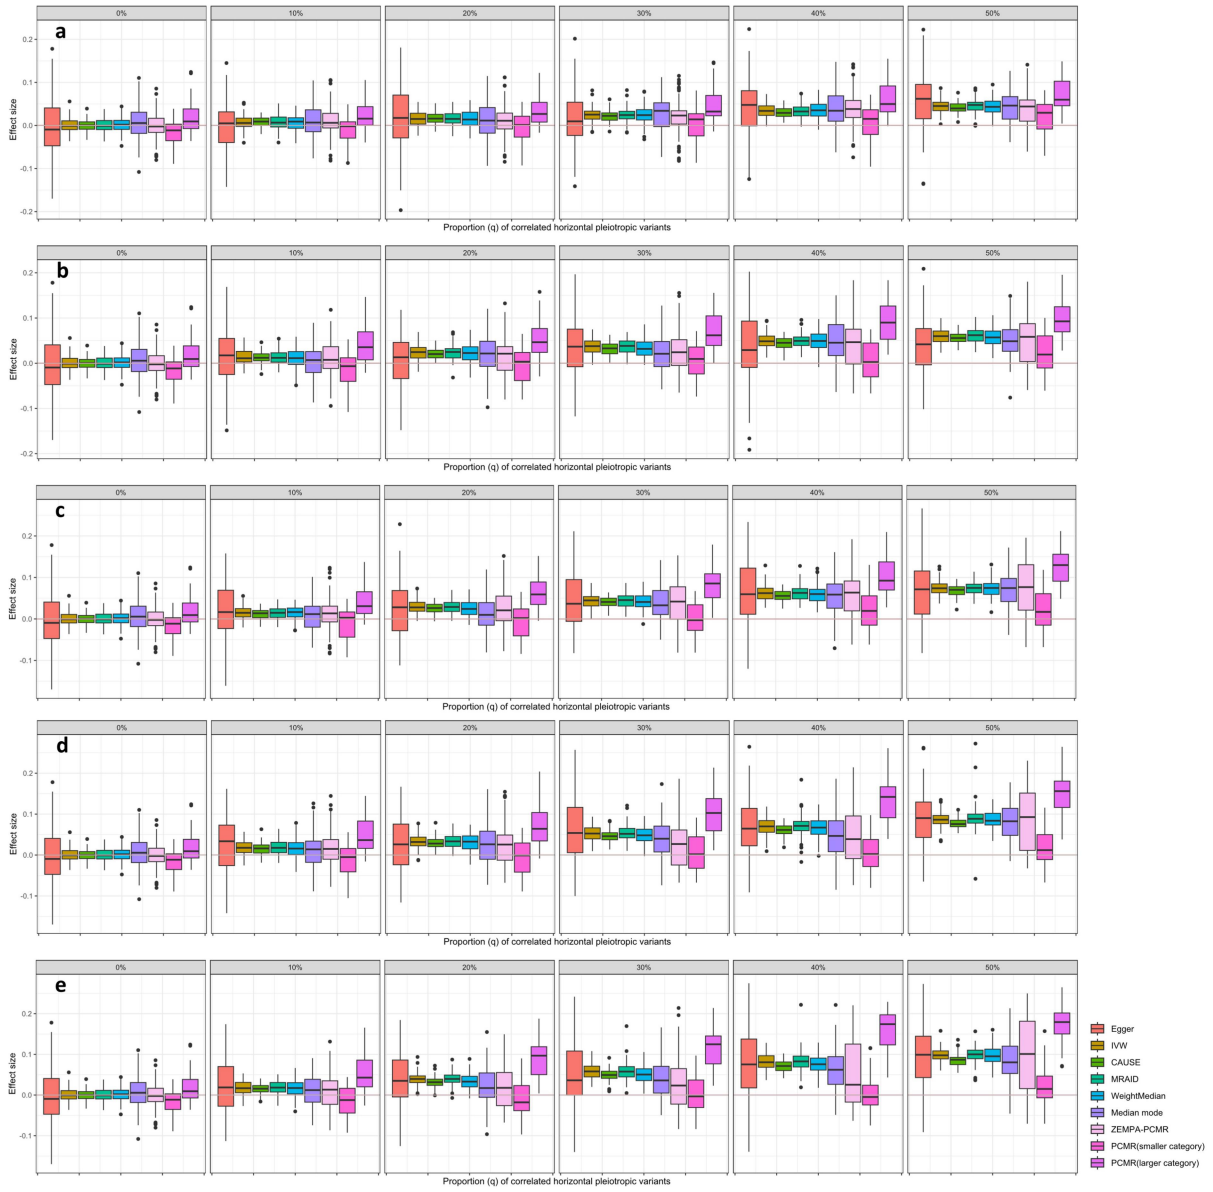

**Supplementary Fig. 3| The fixed effect model of PCMR and alternative methods in the null hypothesis.** The actual causal effect is zero in the presence of correlated pleiotropic variants ranging from 0% to 50% and correlated horizontal pleiotropic effects from  $\sqrt{0.01}$  to  $\sqrt{0.05}$ . **a**,  $\eta = \sqrt{0.01}$  **b**,  $\eta = \sqrt{0.02}$  **c**,  $\eta = \sqrt{0.03}$  **d**,  $\eta = \sqrt{0.04}$  **e**,  $\eta = \sqrt{0.05}$

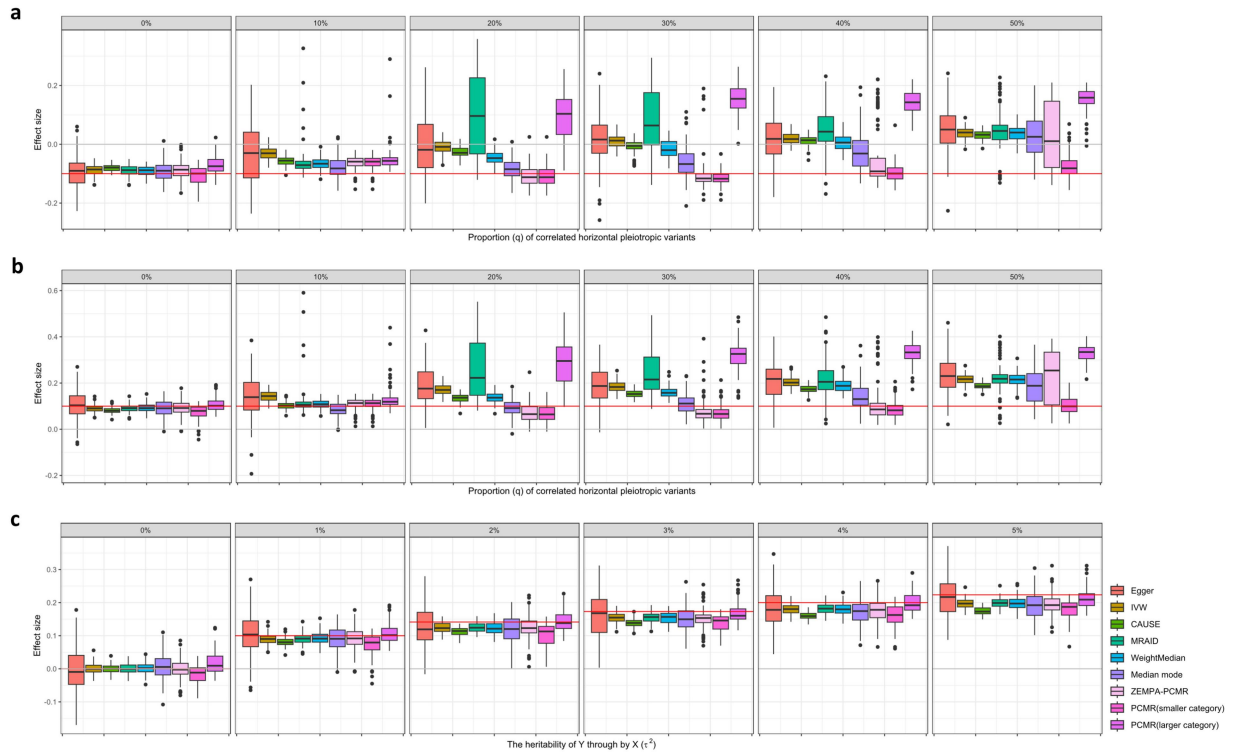

**Supplementary Fig. 4| The fixed effect model of PCMR and other MR methods in the alternative hypothesis. a, b, c, Box plot of estimated causal effect by methods. a, b, Comparison of estimated effect in the presence of correlated pleiotropy. The proportion of correlated horizontal pleiotropic variants from 0% to 50%, and the heritability of outcome mediated by exposure and confounding,  $\tau^2 + \omega^2$ , is 5%. a,  $\gamma = -0.1$  is in the opposite direction with correlated horizontal pleiotropic effect ( $\eta = \sqrt{\omega^2}$ ); b,  $\gamma = 0.1$  is the same direction with correlated horizontal pleiotropic effect. c, Comparison of estimated effect in the absence of correlated pleiotropy. The heritability of outcome mediated by exposure,  $\tau^2$ , from 1% to 5%. ( $\gamma = \sqrt{\tau^2}$ )**

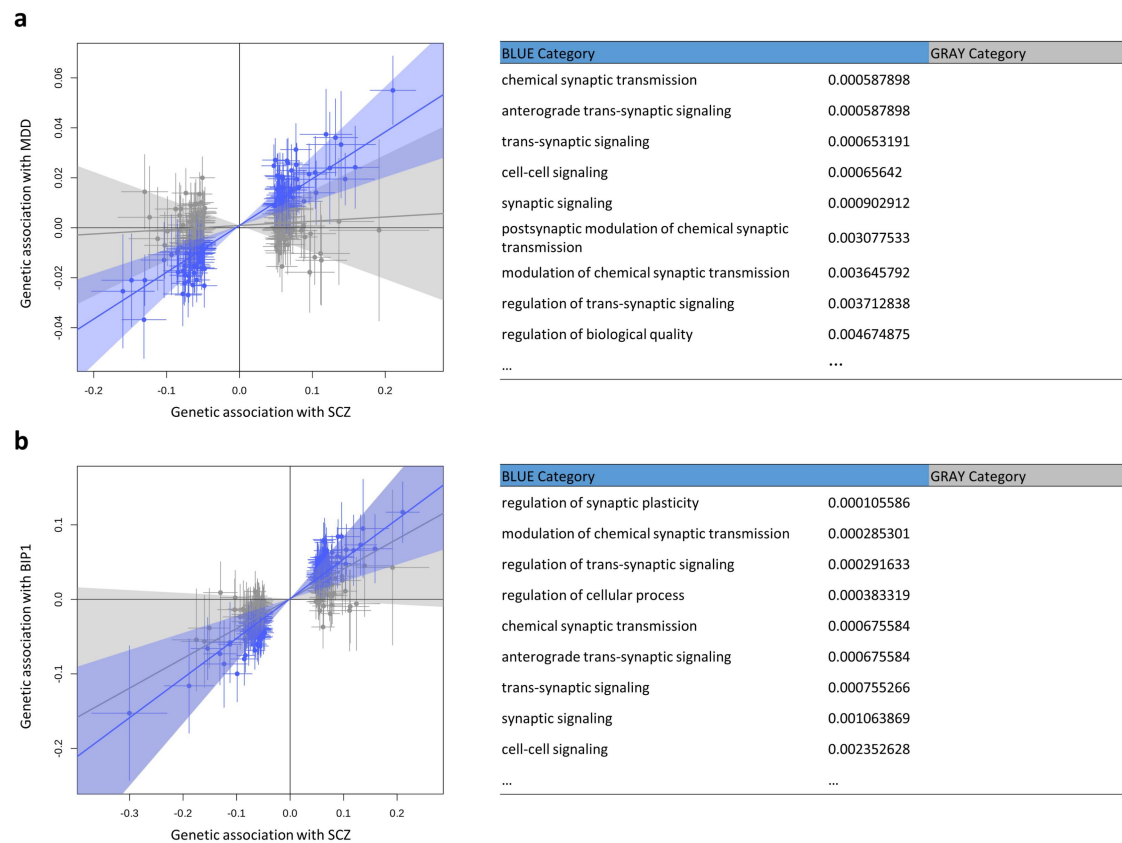

**Supplementary Fig. 5| Enrichment analysis based on classified IV categories by PCMR when SCZ is the exposure.** The BLUE IV category is the largest proportion. **a, SCZ on MDD.** PCMR classified IVs into the BLUE IV category ( $\phi_1 = 0.187$ ,  $\sigma_{\phi_1}^2 = 0.002$ , 50.19%) and the GRAY IV category ( $\phi_2 = 0.017$ ,  $\sigma_{\phi_2}^2 = 0.004$ , 49.81%). **b, SCZ on BIP1.** PCMR classified IVs into the BLUE IV category ( $\phi_1 = 0.532$ ,  $\sigma_{\phi_1}^2 = 0.024$ , 50.01%) and the GRAY IV category ( $\phi_2 = 0.399$ ,  $\sigma_{\phi_2}^2 = 0.049$ , 49.99%).

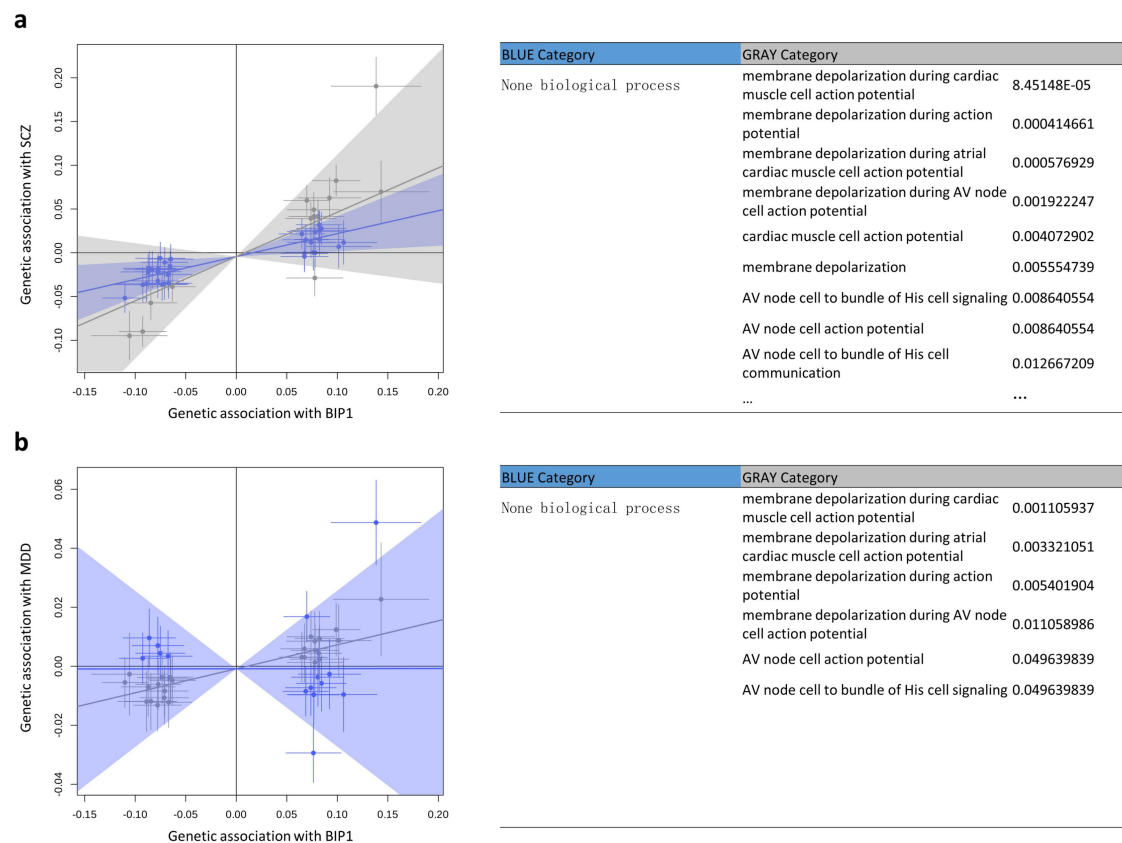

**Supplementary Fig. 6| Enrichment analysis based on classified IV categories by PCMR when BIP1 is the exposure.** The BLUE IV category is the largest proportion. **a**, **BIP1 on SCZ**. PCMR classified IVs into the BLUE IV category ( $\phi_1 = 0.262$ ,  $\sigma_{\phi_1}^2 = 0.010$ , 50.87%) and the GRAY IV category ( $\phi_2 = 0.506$ ,  $\sigma_{\phi_2}^2 = 0.113$ , 49.12%). **b**, **BIP1 on MDD**. PCMR classified IVs into the BLUE IV category ( $\phi_1 = 0.000$ ,  $\sigma_{\phi_1}^2 = 0.018$ , 52.04%) and the GRAY IV category ( $\phi_2 = 0.081$ ,  $\sigma_{\phi_2}^2 = 0.000$ , 47.96%).





**Supplementary Fig. 7| Enrichment analysis based on classified IV categories by PCMR when BIP1 is the exposure.** The BLUE IV category is the largest proportion. **a**, **BIP1 on SCZ**. PCMR classified IVs into the BLUE IV category ( $\phi_1 = 0.262$ ,  $\sigma_{\phi_1}^2 = 0.010$ , 50.87%) and the GRAY IV category ( $\phi_2 = 0.506$ ,  $\sigma_{\phi_2}^2 = 0.113$ , 49.12%). **b**, **BIP1 on MDD**. PCMR classified IVs into the BLUE IV category ( $\phi_1 = 0.000$ ,  $\sigma_{\phi_1}^2 = 0.018$ , 52.04%) and the GRAY IV category ( $\phi_2 = 0.081$ ,  $\sigma_{\phi_2}^2 = 0.000$ , 47.96%).

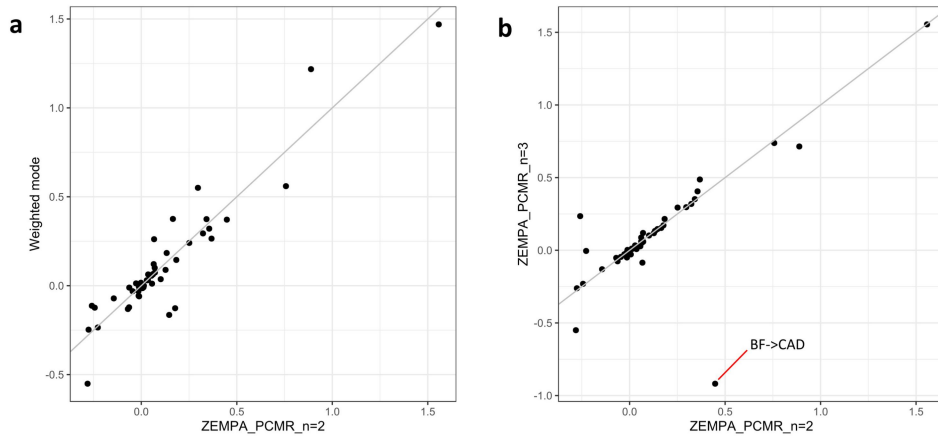

**Supplementary Fig. 8| Comparison of PCMR and Weighted mode under the ZEMPA in 48 pairs of common diseases.** **a**,  $\text{PCMR}(n_\phi = 2)$  and Weighted mode based on ZEMPA. The correlation coefficient of the estimated results between  $\text{PCMR}(n_\phi = 2)$  and Weighted mode reached 0.934. **b**,  $\text{PCMR}(n_\phi = 2)$  and  $\text{PCMR}(n_\phi = 3)$  based on ZEMPA. Most of the estimates are similar in  $\text{PCMR}(n_\phi = 2)$  and  $\text{PCMR}(n_\phi = 3)$ . For the outlier trait pair, BF and CAD, it is mainly due to the detection of distinct IV categories by ZEMPA. The clustering results of the two models are still similar. ( $\text{PCMR}(n_\phi = 2)$ :  $\phi_1 = 0.448, \phi_2 = -0.665$ ;  $\text{PCMR}(n_\phi = 3)$ :  $\phi_1 = -0.918, \phi_2 = 0.383, \phi_3 = 0.383$ )

98 SN1.1 FG and T2D

99 According to the categorization of causality credibility in CAUSE, some literature supports the relationship between FG  
100 and T2D, yet PCMR's causality evaluation did not yield a significant outcome. To gain a deeper understanding of these  
101 findings, we analyzed IVs associated with this pair of traits and attempted to prioritize the IV category determining  
102 causality.

103  
104 PCMR classified the IVs into two distinct categories with correlated horizontal pleiotropic effects:  $\phi_1 = 0.166$  ( $\sigma_{\phi_1}^2 =$   
105  $0.069, 52.00\%$ ) and  $\phi_2 = 2.075$  ( $\sigma_{\phi_2}^2 = 0.018, 48.00\%$ ), respectively. The non-significant result in PCMR's causality  
106 evaluation is the absence of a dominant IV category supporting a significant non-zero causal effect. That is attributed to  
107 the larger IV category, which contributes to an insignificant non-zero effect ( $\phi_1 = 0.166$ ; a bootstrapping test for this IV  
108 category yielded  $P_{boot} = 0.398$ ). Furthermore, we conducted an enrichment analysis of biological processes among the  
109 genes mapped by different IV categories, as illustrated in SN Fig. 1a. The enrichment revealed that the BLUE IV category  
110 (corresponding to  $\phi_1$ ) did not exhibit enrichment in any biological process. Conversely, the GRAY IV category  
111 (corresponding to  $\phi_2$ ) showed significant enrichment in 48 biological processes, with the regulation of insulin secretion  
112 being the most prominent ( $P = 5.603 \times 10^{-5}$ ). Given the importance of insulin regulation in T2D, the GRAY category  
113 might exhibit correlated horizontal pleiotropy ( $\phi_2 = \gamma + \eta$ ). Thus, the BLUE category is more likely to correspond to the  
114 causality of FG and T2D, and we conducted a bootstrap test to make causal inferences based on the GRAY category  
115 ( $P_{gray} = 0.398, 95\%CL: (-0.251, 1.761)$ ). This finding aligns with that of Merino et al.<sup>16</sup>, which excludes FG-increasing  
116 variants associated with type 2 diabetes.

117

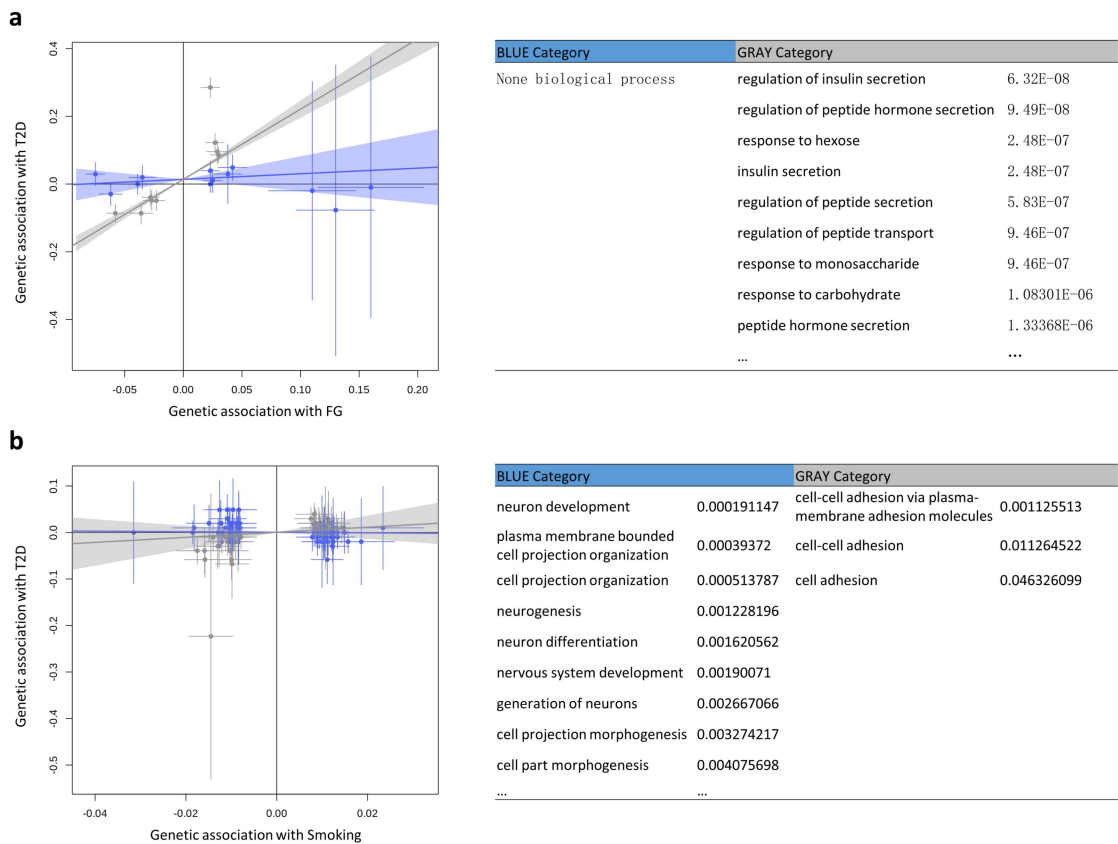

118

119 **SN Fig. 1|Enrichment analysis based on classified IV categories by PCMR.**  $\beta_X$  estimates from GWAS summary of  
120 exposure (horizontal axis) are plotted against  $\beta_Y$  estimates from GWAS summary of outcome (vertical axis). **a, FG and**  
121 **T2D.** PCMR classified IVs into the BLUE IV category ( $\phi_1 = 0.166, \sigma_{\phi_1}^2 = 0.069, 52.00\%$ ) and GRAY IV category  
122 ( $\phi_2 = 2.075, \sigma_{\phi_2}^2 = 0.018, 48.00\%$ ). **b, Smoking and T2D.** PCMR classified IVs into the BLUE IV category ( $\phi_1 = -$   
123  $0.063, \sigma_{\phi_1}^2 = 0.0, 50.11\%$ ) and GRAY IV category ( $\phi_2 = 0.545, \sigma_{\phi_2}^2 = 0.407, 49.89\%$ ).

## 125 SN1.2 Smoking and T2D

126 Smoking has been identified as a cause of the increased risk of T2D<sup>17</sup>, but no method can detect a significant relationship  
 127 between smoking and T2D. PCMR classified all IVs into two distinct IV categories with correlated HVP effects  
 128 (proportion)  $\phi_1 = -0.063$  ( $\sigma_{\phi_1}^2 = 0.0, 50.11\%$ ) and  $\phi_2 = 0.545$  ( $\sigma_{\phi_2}^2 = 0.407, 49.89\%$ ), respectively. Though PCMR's  
 129 pleiotropy test did not detect significant correlated horizontal pleiotropy ( $P_{plei-test} = 0.269$ ), the two IV categories  
 130 showed distinct associated biological processes in enrichment analysis, as shown in SN Fig. 1b. The BLUE IV category  
 131 exhibited significant enrichment in 14 biological processes, with neuron development being the most significant ( $P =$   
 132  $1.91 \times 10^{-4}$ ). On the contrary, the GRAY IV category exhibited significant enrichment in 3 biological processes,  
 133 primarily related to cell-cell adhesion. Dysregulation in dietary intake<sup>18,19</sup> and insulin secretion<sup>20</sup> associated with  
 134 neurotransmission can trigger the onset of type 2 diabetes (T2D), indicating that the BLUE category might exhibit  
 135 correlated horizontal pleiotropy. Correlated horizontal pleiotropy, which is in the opposite direction of the actual causal  
 136 effect, may be responsible for the failure of all methods to detect a significant causal relationship. We employed a  
 137 bootstrap test to make causal inferences based on the GRAY category and obtained a near-significant result ( $P_{gray} =$   
 138  $0.07, 95\%CL: (-0.022, 1.23)$ ).

139

140

141

## 142 SN 2 EM estimation

143 We apply the EM algorithm to estimate the parameters of  $\hat{\Theta} = \arg \max_{\Theta} \ln L(\Theta)$ , where

$$\ln L(\Theta) \propto \sum_i \sum_j \sum_k \left[ Q(Z^{(i)} = (j, k)) \ln \frac{f(\hat{\beta}_{Y,i} - \phi_j \hat{\beta}_{X,i} - \theta_k | \phi_j, b_k) \cdot q_{\phi_j} \pi_{\theta_k}}{Q(Z^{(i)} = (j, k))} \right]$$

144 To better illustrate the derivation of **the random effect model**, we first simplify by assuming two independent GWAS  
 145 summary statistics of exposure and outcome, setting  $\rho$  to zero, and omitting the variance of exposure association  $\hat{s}_{X,i}^2$ ,  
 146 setting  $(\phi_j)^2 \hat{s}_{X,i}^2$  to zero. Therefore, the distribution (4) in the main text,

$$\hat{\beta}_{Y,i} - \phi_j \hat{\beta}_{X,i} - \theta_k \sim N(0, \sigma^2)$$

147 where  $\sigma^2 = \hat{s}_{Y,i}^2 - 2\phi_j \cdot \rho \hat{s}_{X,i} \hat{s}_{Y,i} + (\phi_j)^2 \hat{s}_{X,i}^2 + \hat{\beta}_{X,i}^2 \sigma_{\phi_j}^2 + \sigma_{\theta_k}^2$ , is simplified to

$$\hat{\beta}_{Y,i} - \phi_j \hat{\beta}_{X,i} - \theta_k | \phi_j, b_k \sim N(0, \hat{s}_{Y,i}^2 + \hat{\beta}_{X,i}^2 \sigma_{\phi_j}^2 + \sigma_{\theta_k}^2).$$

148 We set the initial parameters as  $\Theta_0 = (q_{\phi_{j0}}, \phi_{j0}, \sigma_{\eta_{j0}}, \pi_{b_{k0}}, b_{k0}, \sigma_{b_{k0}})$ , and let  $\Theta_{old} = \Theta_0$ .

149

150 **In the E-step**, we derive  $Q$  function by

$$Q(Z^{(i)} = (j, k) | \Theta_{old}) = \frac{f_{j,k}(\hat{\beta}_{Y,i} - \phi_j \hat{\beta}_{X,i} - \theta_k | \Theta_{old})}{\sum_j \sum_k p_{j,k}(\hat{\beta}_{Y,i} - \phi_j \hat{\beta}_{X,i} - \theta_k | \Theta_{old})}$$

151 where  $f_{j,k}$  is the density function of  $N(0, \hat{s}_{Y,i}^2 + \hat{\beta}_{X,i}^2 \sigma_{\phi_j}^2 + \sigma_{\theta_k}^2)$ .

152

153 **In the M-step**, we estimate parameters of interest to the maximum  $\ln L(\Theta)$ . By setting the derivative of  $\ln L(\Theta)$  function  
 154 to zero, we obtain:

$$\phi_j = \frac{\sum_i \sum_k [Q(Z^{(i)} = (j, k)) \hat{\beta}_{X,i} (\hat{\beta}_{Y,i} - b_k) / (\hat{s}_{Y,i}^2 + \hat{\beta}_{X,i}^2 \sigma_{\phi_j}^2 + \sigma_{\theta_k}^2)]}{\sum_i \sum_k [Q(Z^{(i)} = (j, k)) \hat{\beta}_{X,i}^2 / (\hat{s}_{Y,i}^2 + \hat{\beta}_{X,i}^2 \sigma_{\phi_j}^2 + \sigma_{\theta_k}^2)]}, j = 1, \dots, n_{\phi}$$

$$b_k = \frac{\sum_i \sum_j \left[ Q \left( Z^{(i)} = (j, k) \right) \left( \widehat{\beta}_{Y,i} - \phi_j \widehat{\beta}_{X,i} \right) / \left( \widehat{s}_{Y,i}^2 + \widehat{\beta}_{X,i}^2 \sigma_{\phi_j}^2 + \sigma_{\theta_k}^2 \right) \right]}{\sum_i \sum_j \left[ Q \left( Z^{(i)} = (j, k) \right) / \left( \widehat{s}_{Y,i}^2 + \widehat{\beta}_{X,i}^2 \sigma_{\phi_j}^2 + \sigma_{\theta_k}^2 \right) \right]}, \quad k = 1, \dots, n_\theta$$

$$q_{\eta_j} = \frac{\sum_i \sum_k Q \left( Z^{(i)} = (j, k) \right)}{\sum_i 1}, \quad j = 1, \dots, n_\phi$$

$$\pi_{b_k} = \frac{\sum_i \sum_j Q \left( Z^{(i)} = (j, k) \right)}{\sum_i 1}, \quad k = 1, \dots, n_\theta$$

155 The analytical solutions for  $\frac{\partial L}{\partial(\sigma_{\phi_j}^2)} = 0$  and  $\frac{\partial L}{\partial(\sigma_{\theta_k}^2)} = 0$  are complicated, so we use the optimization method to estimate:

$$\sigma_{\phi_j}^2 = \arg \max_{\sigma_{\phi_j}^2} L(\Theta | \Theta_{old}), \quad j = 1, \dots, n_\phi$$

$$\sigma_{\theta_k}^2 = \arg \max_{\sigma_{\theta_k}^2} L(\Theta | \Theta_{old}), \quad k = 1, \dots, n_\theta$$

156 Repeat the E-step and M-step until convergence. Just set  $\sigma_{\phi_j}^2$  at zero, the derivation involves solving **the fixed effect**  
 157 **model** of PCMR.  
 158

159 When considering the sample overlapping and not ignoring the variance of exposure, where  $\rho \neq 0$  and  $(\phi_j)^2 \widehat{s}_{X,i}^2 \neq 0$ , the  
 160 partial derivation of  $\frac{\partial L}{\partial(\gamma + \eta_j)} = 0$  lacks an analytical solution. The estimation of  $\phi_j$  also need by optimization method:

$$\phi_j = \arg \max_{\phi_j} L(\Theta | \Theta_{old}), \quad j = 1, \dots, n_\phi$$

161 We use the 'optimize' function in R for the optimization method here.

### SN 3 Alternative methods

We compare the performance of PCMR with six alternative methods, including IVW, Egger, Weighted-median, weighted mode, CAUSE and MRAID. We also compare PCMR's pleiotropy test with MR-PRESSO outlier test in detecting correlated horizontal pleiotropy. The candidate IVs are selected by each method default, and LD pruning ensures no pair of IVs has a pairwise  $r^2 > 0.1$ . These methods are implemented as follows.

| method          | R package              | Version    | Function  | parameters | Threshold of IVs   |
|-----------------|------------------------|------------|-----------|------------|--------------------|
| IVW             | MendelianRandomization | 0.6.0      | mr_ivw    | default    | $5 \times 10^{-8}$ |
| Egger           | MendelianRandomization | 0.6.0      | mr_egger  | default    | $5 \times 10^{-8}$ |
| Weighted-median | MendelianRandomization | 0.6.0      | mr_median | default    | $5 \times 10^{-8}$ |
| Median mode     | MendelianRandomization | 0.6.0      | mr_mbe    | default    | $5 \times 10^{-8}$ |
| CAUSE           | cause                  | 1.2.0.0335 | cause     | default    | $1 \times 10^{-3}$ |
| MRAID           | MRAID                  | 1.0        | MRAID     | default    | $5 \times 10^{-8}$ |
| MR-PRESSO       | MRPRESSO               | 1.0        | mr_presso | default    | $5 \times 10^{-8}$ |

**Note:** MRAID can use a relaxed p-value threshold and estimate causal effect under LD, influencing the statistic power but not the false positive control.<sup>21</sup> For convenience, we use a strict threshold ( $5 \times 10^{-8}$ ) and LD pruning for MRAID.

## References

1. Willer, C. J. *et al.* Discovery and refinement of loci associated with lipid levels. *Nat. Genet.* **45**, 1274–1283 (2013).
2. Yengo, L. *et al.* Meta-analysis of genome-wide association studies for height and body mass index in ~ 700000 individuals of European ancestry. *Hum. Mol. Genet.* **27**, 3641–3649 (2018).
3. Locke, A. E. *et al.* Genetic studies of body mass index yield new insights for obesity biology. *Nature* **518**, 197–206 (2015).
4. Lu, Y. *et al.* New loci for body fat percentage reveal link between adiposity and cardiometabolic disease risk. *Nat. Commun.* **7**, 10495 (2016).
5. Horikoshi, M. *et al.* Genome-wide associations for birth weight and correlations with adult disease. *Nature* **538**, 248–252 (2016).
6. Evangelou, E. *et al.* Genetic analysis of over 1 million people identifies 535 new loci associated with blood pressure traits. *Nat. Genet.* **50**, 1412–1425 (2018).
7. Dupuis, J. *et al.* New genetic loci implicated in fasting glucose homeostasis and their impact on type 2 diabetes risk. *Nat. Genet.* **42**, 105–116 (2010).
8. Liu, M. *et al.* Association studies of up to 1.2 million individuals yield new insights into the genetic etiology of tobacco and alcohol use. *Nat. Genet.* **51**, 237–244 (2019).
9. van der Harst, P. & Verweij, N. Identification of 64 Novel Genetic Loci Provides an Expanded View on the Genetic Architecture of Coronary Artery Disease. *Circ. Res.* **122**, 433–443 (2018).
10. Malik, R. *et al.* Multiancestry genome-wide association study of 520,000 subjects identifies 32 loci associated with stroke and stroke subtypes. *Nat. Genet.* **50**, 524–537 (2018).
11. Morris, A. P. *et al.* Large-scale association analysis provides insights into the genetic architecture and pathophysiology of type 2 diabetes. *Nat. Genet.* **44**, 981–990 (2012).
12. Demenais, F. *et al.* Multiancestry association study identifies new asthma risk loci that colocalize with immune-cell enhancer marks. *Nat. Genet.* **50**, 42–53 (2018).
13. Trubetskoy, V. *et al.* Mapping genomic loci implicates genes and synaptic biology in schizophrenia. *Nature* **604**, 502–508 (2022).
14. Howard, D. M. *et al.* Genome-wide meta-analysis of depression identifies 102 independent variants and highlights the importance of the prefrontal brain regions. *Nat. Neurosci.* **22**, 343–352 (2019).
15. Mullins, N. *et al.* Genome-wide association study of more than 40,000 bipolar disorder cases provides new insights into the underlying biology. *Nat. Genet.* **53**, 817–829 (2021).
16. Merino, J. *et al.* Genetically Driven Hyperglycemia Increases Risk of Coronary Artery Disease Separately From Type 2 Diabetes. *Diabetes Care* **40**, 687–693 (2017).
17. National Center for Chronic Disease Prevention and Health Promotion (US) Office on Smoking and Health. *The Health Consequences of Smoking—50 Years of Progress: A Report of the Surgeon General*. (Centers for Disease Control and Prevention (US), Atlanta (GA), 2014).
18. Wu, Q., Boyle, M. P. & Palmiter, R. D. Loss of GABAergic signaling by AgRP neurons to the parabrachial nucleus leads to starvation. *Cell* **137**, 1225–1234 (2009).
19. Krashes, M. J., Shah, B. P., Koda, S. & Lowell, B. B. Rapid versus delayed stimulation of feeding by the endogenously released AgRP neuron mediators GABA, NPY, and AgRP. *Cell Metab.* **18**, 588–595 (2013).
20. REV-ERB in GABAergic neurons controls diurnal hepatic insulin sensitivity - PubMed. <https://pubmed.ncbi.nlm.nih.gov/33762728/>.
21. Yuan, Z. *et al.* Likelihood-based Mendelian randomization analysis with automated instrument selection and horizontal pleiotropic modeling. *Sci. Adv.* **8**, eabl5744 (2022).
